# Supplementary material
Source: PubMed Central journal article supplement (PMC5434703)
Supplement: NIHMS482497-supplement-supplement.pdf [file NIHMS482497-supplement-supplement.pdf]

|                     | Father OF factor | Father ln(cen) | Father ln(%p) | Father ln(time) | Father ln(ent) | Father ln(tp) | Offspring OF factor | Offspring ln(cen) | Offspring ln(%p) | Offspring ln(time) | Offspring ln(ent) | Offspring ln(tp) |
|---------------------|------------------|----------------|---------------|-----------------|----------------|---------------|---------------------|-------------------|------------------|--------------------|-------------------|------------------|
| Father OF factor    | 1.000            | .959           | .810          | .968            | .981           | .793          | .164                | .151              | .129             | .162               | .205              | .125             |
| Father ln(cen)      |                  | 1.000          | .891          | .871            | .914           | .656          | .150                | .138              | .114             | .155               | .192              | .108             |
| Father ln(%p)       |                  |                | 1.000         | .698            | .749           | .324          | .133                | .133              | .085             | .152               | .174              | .083             |
| Father ln(time)     |                  |                |               | 1.000           | .979           | .813          | .196                | .182              | .163             | .187               | .232              | .162             |
| Father ln(ent)      |                  |                |               |                 | 1.000          | .780          | .184                | .168              | .149             | .180               | .221              | .152             |
| Father ln(tp)       |                  |                |               |                 |                | 1.000         | .070                | .056              | .068             | .053               | .103              | .053             |
| Offspring OF factor |                  |                |               |                 |                |               | 1.000               | .964              | .933             | .968               | .964              | .908             |
| Offspring ln(cen)   |                  |                |               |                 |                |               |                     | 1.000             | .962             | .889               | .875              | .841             |
| Offspring ln(%p)    |                  |                |               |                 |                |               |                     |                   | 1.000            | .853               | .851              | .755             |
| Offspring ln(time)  |                  |                |               |                 |                |               |                     |                   |                  | 1.000              | .982              | .859             |
| Offspring ln(ent)   |                  |                |               |                 |                |               |                     |                   |                  |                    | 1.000             | .856             |
| Offspring ln(tp)    |                  |                |               |                 |                |               |                     |                   |                  |                    |                   | 1.000            |

**Supplemental Table 1. Correlation matrix of paternal and offspring open-field measures.**

Demonstrates a high level of correlation between separate open-field behavioral measures. High between measure correlations allowed 5 measures to be reduced to a single latent variable in fathers and offspring for use in subsequent analyses.

- Paternal OF activity high (3 litters, 12 offspring)
- Paternal OF activity low (4 litters, 24 offspring)
- \*  $p < 0.05$

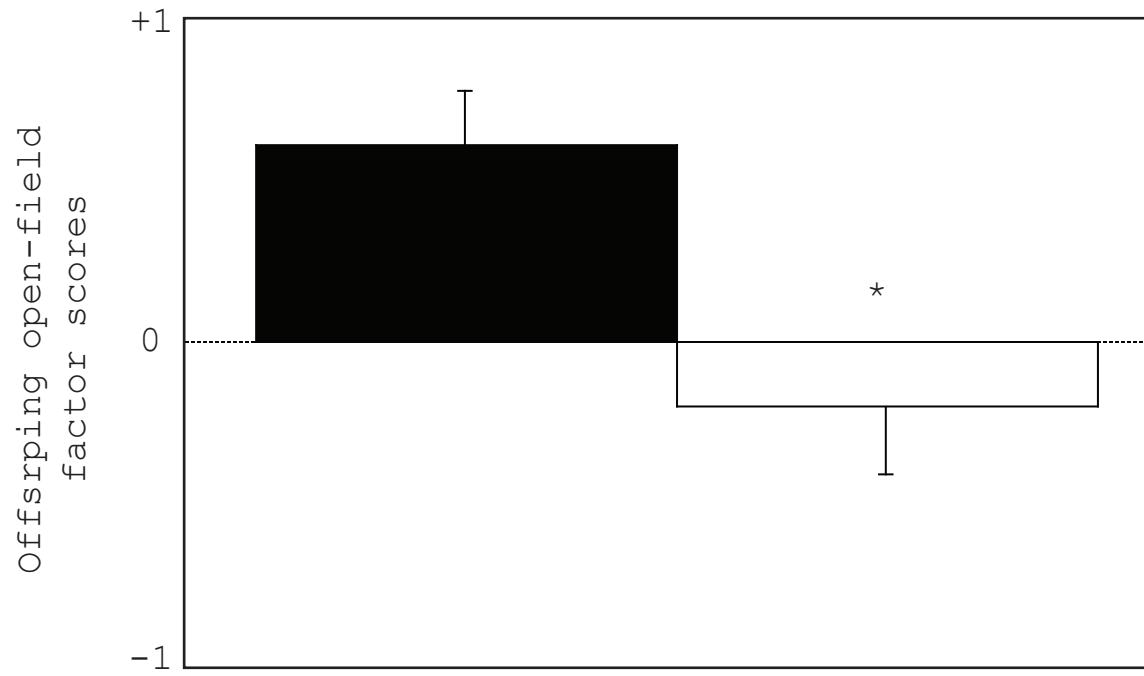

**Supplemental figure 1. Pilot experiment: Paternal open-field behavior predicts offspring open-field behavior.** Open-field factor scores of offspring from fathers separated by extremes of open-field behavior show that offspring of fathers with high levels of open-field activity have significantly higher levels of open-field activity than offspring of low activity fathers.
